# Supplementary material for: Prediction of a Large-Scale Database of Collision Cross-Section and Retention Time Using Machine Learning to Reduce False Positive Annotations in Untargeted Metabolomics
Source: MDPI journal article supplement (doi:10.3390/metabo13020282), 2023-02-15

## SUPPLEMENTARY MATERIALS

**Table S1.** Performances of the SVR model using QSRR Automator algorithm.

| Scoring Metric                                                    | Value(s)                                                               |
|-------------------------------------------------------------------|------------------------------------------------------------------------|
| Final Model R2 Score                                              | 0.999                                                                  |
| Final Model Mean Absolute Error                                   | 0.100                                                                  |
| Cross Validation R2 Values                                        | [0.917 0.938 0.849 0.890 0.884 0.843 0.909 0.872 0.949 0.926]          |
| Mean of Cross Validation R2 Values                                | 0.898                                                                  |
| Median of Cross Validation R2 Values                              | 0.900                                                                  |
| Standard Deviation of Cross Validation R2 Values                  | 0.034                                                                  |
| Cross Validation Mean Absolute Error Values                       | [0.933, 0.649, 0.761, 0.948, 1.035, 1.059, 0.666, 0.752, 0.661, 0.676] |
| Mean of Cross Validation Mean Absolute Error Values               | 0.814                                                                  |
| Median of Cross Validation Mean Absolute Error Values             | 0.756                                                                  |
| Standard Deviation of Cross Validation Mean Absolute Error Values | 0.154                                                                  |

**Figure S1.** Linear regression of Predicted Rt (min) using QSRR Automator algorithm by measured Rt (min) of compounds used from the developed method. This figure was generated by QSRR Automator from all the data available for model construction (including training data).

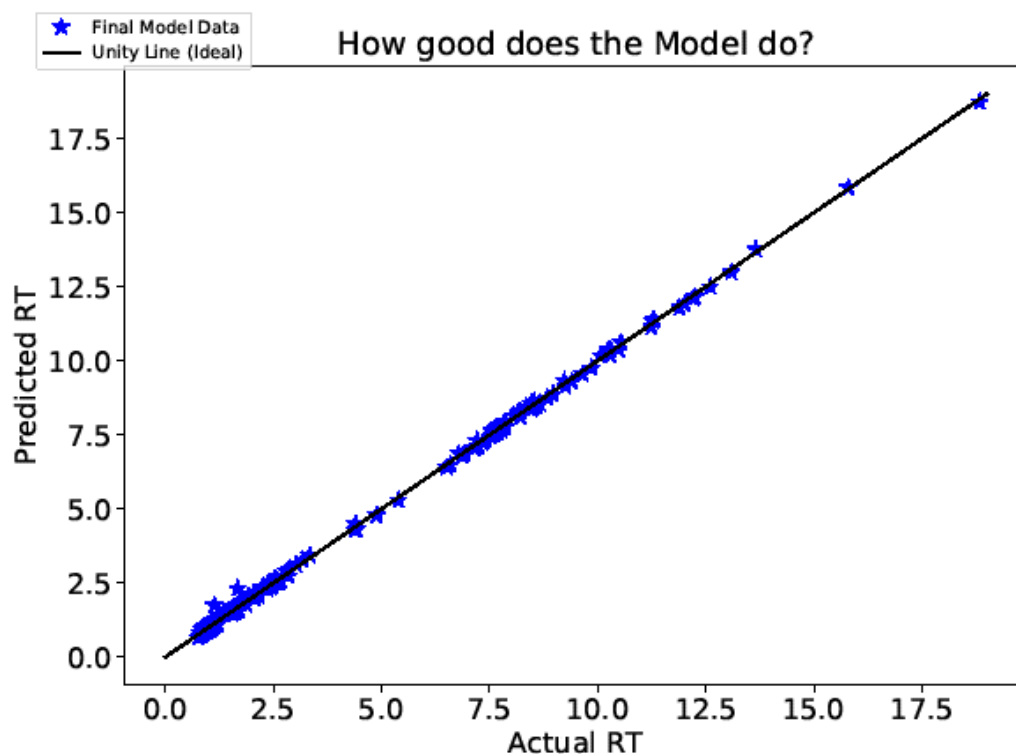

Supplement: s1 [file s1]
